# Supplementary material
Source: HighWire-hosted journal article supplement (https://erj.ersjournals.com/content/58/2/2004400)
Supplement: inline-supplementary-material-1 [file inline-supplementary-material-1.pdf]

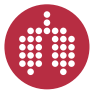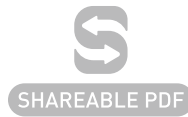

# Dynamic compliance and reactance in older non-smokers with asthma and fixed airflow obstruction

Timothy Durack<sup>1,2,3</sup>, David G. Chapman<sup>1,2,4</sup>, Sandra Rutting<sup>1,2,5</sup>, Cindy Thamrin<sup>2,3</sup>,  
Gregory G. King<sup>1,2,3,5</sup> and Katrina O. Tonga<sup>1,2,3,6,7</sup>

<sup>1</sup>The Department of Respiratory Medicine, Royal North Shore Hospital, St Leonards, Australia. <sup>2</sup>Airway Physiology and Imaging Group and The Woolcock Emphysema Centre, The Woolcock Institute of Medical Research, Glebe, Australia. <sup>3</sup>Faculty of Medicine and Health, The University of Sydney, Sydney, Australia. <sup>4</sup>Discipline of Medical Sciences, University of Technology Sydney, Broadway, Australia. <sup>5</sup>NHMRC Centre of Excellence in Severe Asthma, New Lambton Heights, Australia. <sup>6</sup>The Department of Thoracic and Lung Transplant Medicine, St Vincent's Hospital, Darlinghurst, Australia. <sup>7</sup>Faculty of Medicine, St Vincent's Clinical School, The University of New South Wales, Sydney, Australia.

Katrina Tonga ([katrina.tonga@sydney.edu.au](mailto:katrina.tonga@sydney.edu.au))

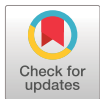

Shareable abstract (@ERSpublications)

**In older non-smokers with asthma and fixed airflow obstruction,  $X_5$  measured by oscillometry reflects dynamic rather than static compliance. Distinguishing between dynamic and static compliance is important as they are due to different factors.** <https://bit.ly/3th0uEr>

**Cite this article as:** Durack T, Chapman DG, Rutting S, *et al.* Dynamic compliance and reactance in older non-smokers with asthma and fixed airflow obstruction. *Eur Respir J* 2021; 58: 2004400 [DOI: 10.1183/13993003.04400-2020].

This single-page version can be shared freely online.

Copyright ©The authors 2021. For reproduction rights and permissions contact [permissions@ersnet.org](mailto:permissions@ersnet.org)

Received: 3 Dec 2020  
Accepted: 5 April 2021

*To the Editor:*

In asthma, abnormal mechanical properties of the airways and lung tissue leads to airway narrowing and changes in ventilation distribution [1]. Ventilation distribution is determined by the variation of time constants [2], the product of resistance and static compliance of individual lung units. Ventilation distribution is heterogeneous in healthy lungs, but even more so in airway diseases, including asthma [3]. This is because time constants are often even more heterogeneous in disease due to changes in resistances and compliances [3, 4]. Lung compliance measured under dynamic conditions, *e.g.* during breathing (dynamic compliance, or  $C_{dyn}$ ), is sensitive to these heterogeneities in time constants.  $C_{dyn}$  decreases relative to static compliance ( $C_{stat}$ ) with increasing ventilation heterogeneity [2, 3, 5], due to diversion of ventilation from lung units with longer to those with shorter time constants [6]. Hence  $C_{dyn}$  is a measure of lung function in relation to ventilation heterogeneity under tidal breathing conditions, that complements spirometry. However,  $C_{dyn}$  is not used clinically because it requires invasive oesophageal pressure measurements.

Copyright ©The authors 2021. For reproduction rights and permissions contact [permissions@ersnet.org](mailto:permissions@ersnet.org)
